# Supplementary material
Source: publisher figshare collection journal article supplement (https://tandf.figshare.com/ndownloader/files/15761438)
Supplement: Supplementary file 1 [file 15761438]

**Project Torino Beta**

**Student Post-Questionnaire**

1. What do you think computer scientists do? (Give three examples)

| 1.  2.  3. |
| --- |

1. Can you describe a computer scientist?

| 1.  2.  3. |
| --- |

1. Could the computer scientist you described, be you?

| **Yes** | **Maybe** | **No** |
| --- | --- | --- |
|  |  |  |

1. Give two reasons why you chose that answer for the last question.

| 1.  2. |
| --- |

1. There are five stars here. One star means not so good, five stars means very good, two, three and four something in between.

How many stars would you like to give yourself now for your coding / programming ability?

|  |  |  |  |  |
| --- | --- | --- | --- | --- |
| **1** | **2** | **3** | **4** | **5** |
|  |  |  |  |  |

1. Give two reasons why you chose that rating for your coding / programming ability.

| 1.  2. |
| --- |

1. How interested are you in coding / programming?

| **Not at all interested** | **Slightly interested** | **Somewhat interested** | **Quite interested** | **Extremely interested** |
| --- | --- | --- | --- | --- |
|  |  |  |  |  |

1. How useful do you think coding / programming will be to you in the future?

| **Not at all useful** | **Slightly useful** | **Somewhat useful** | **Quite useful** | **Extremely useful** |
| --- | --- | --- | --- | --- |
|  |  |  |  |  |

1. How excited are you before you start your Torino sessions?

| **Not at all excited** | **Slightly excited** | **Somewhat excited** | **Quite excited** | **Extremely excited** |
| --- | --- | --- | --- | --- |
|  |  |  |  |  |

1. How important is it to you to do well in your Torino sessions?

| **Not at all important** | **Slightly important** | **Somewhat important** | **Quite important** | **Extremely important** |
| --- | --- | --- | --- | --- |
|  |  |  |  |  |

1. When not using Torino, how often do you talk about ideas from your Torino sessions?

| **Never** | **Once a month** | **Every two weeks** | **Every week** | **Every day** |
| --- | --- | --- | --- | --- |
|  |  |  |  |  |

1. Another child your age is thinking about learning coding using Torino, how would you describe Torino to them?

|  |
| --- |
